# Supplementary material for: Technical Note: Improved synthetic routes to cis- and trans-(2-Methyloxirane-2,3-diyl)dimethanol (cis- and trans-β-isoprene epoxydiol)
Source: Copernicus journal article supplement (doi:10.5194/egusphere-2023-476), 2023-03-31
Supplement: Supplementary file 1 [file egusphere-2023-476-supplement.pdf]

**Technical Note: Improved synthetic routes to *cis*- and *trans*-(2-Methyloxirane-2,3-diyl)dimethanol (*cis*- and *trans*- $\beta$ -isoprene epoxydiol).**

Molly Frauenheim,<sup>1</sup> Jason D. Surratt,<sup>1,2</sup> Zhenfa Zhang, Avram Gold<sup>1</sup>

<sup>1</sup>Department of Environmental Sciences and Engineering, Gillings School of Global Public Health, The University of North Carolina at Chapel Hill, NC, 27599-7431, USA

<sup>2</sup>Department of Chemistry, College of Arts and Sciences, The University of North Carolina at Chapel Hill, Chapel Hill, NC, 27599-3290, USA

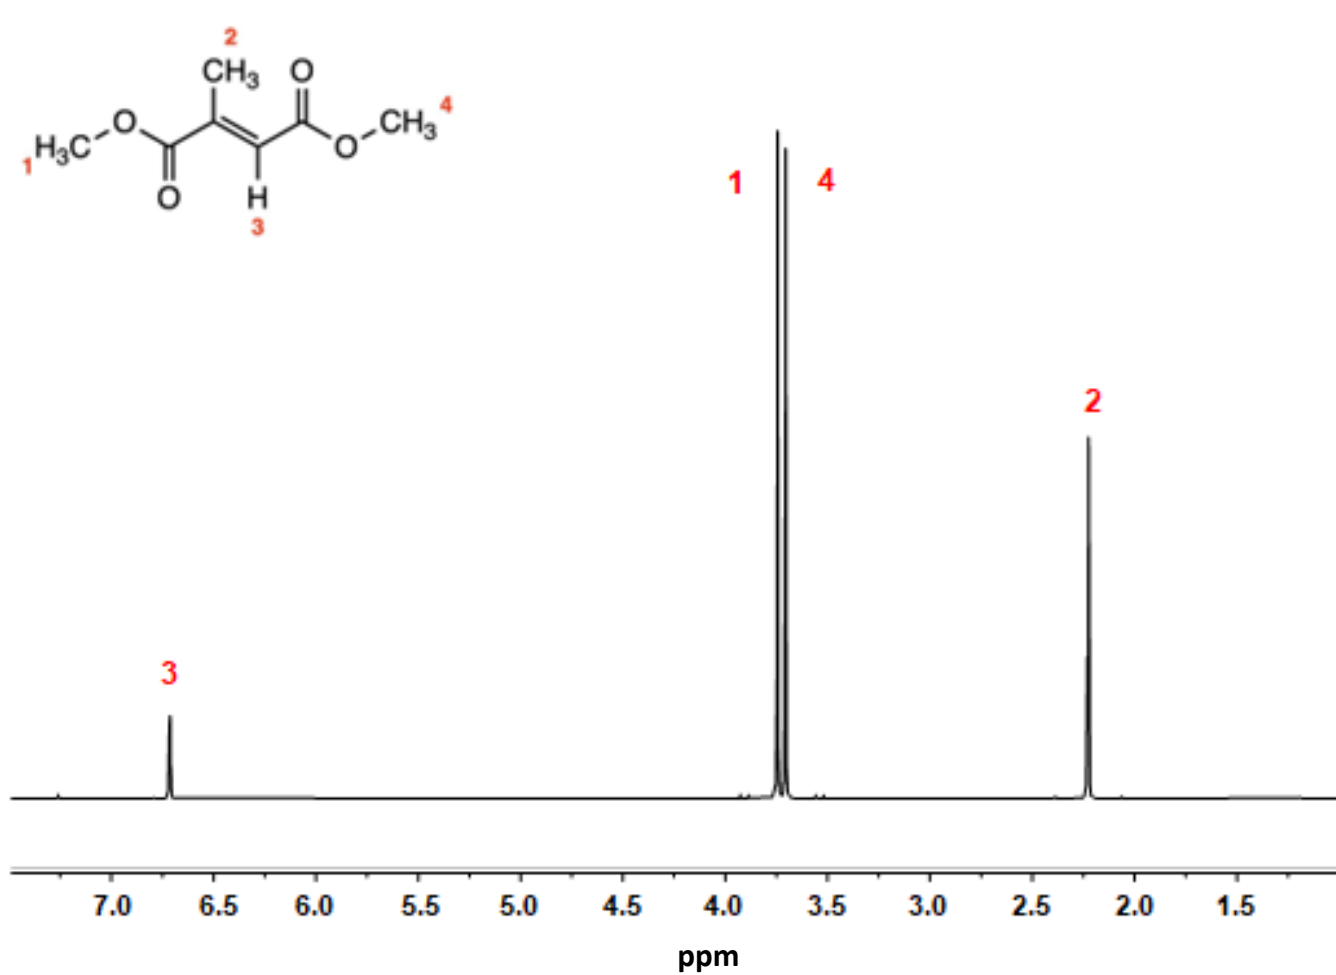

Figure S1. <sup>1</sup>H NMR (400 MHz, D<sub>2</sub>O) mesaconic acid, dimethyl ester.

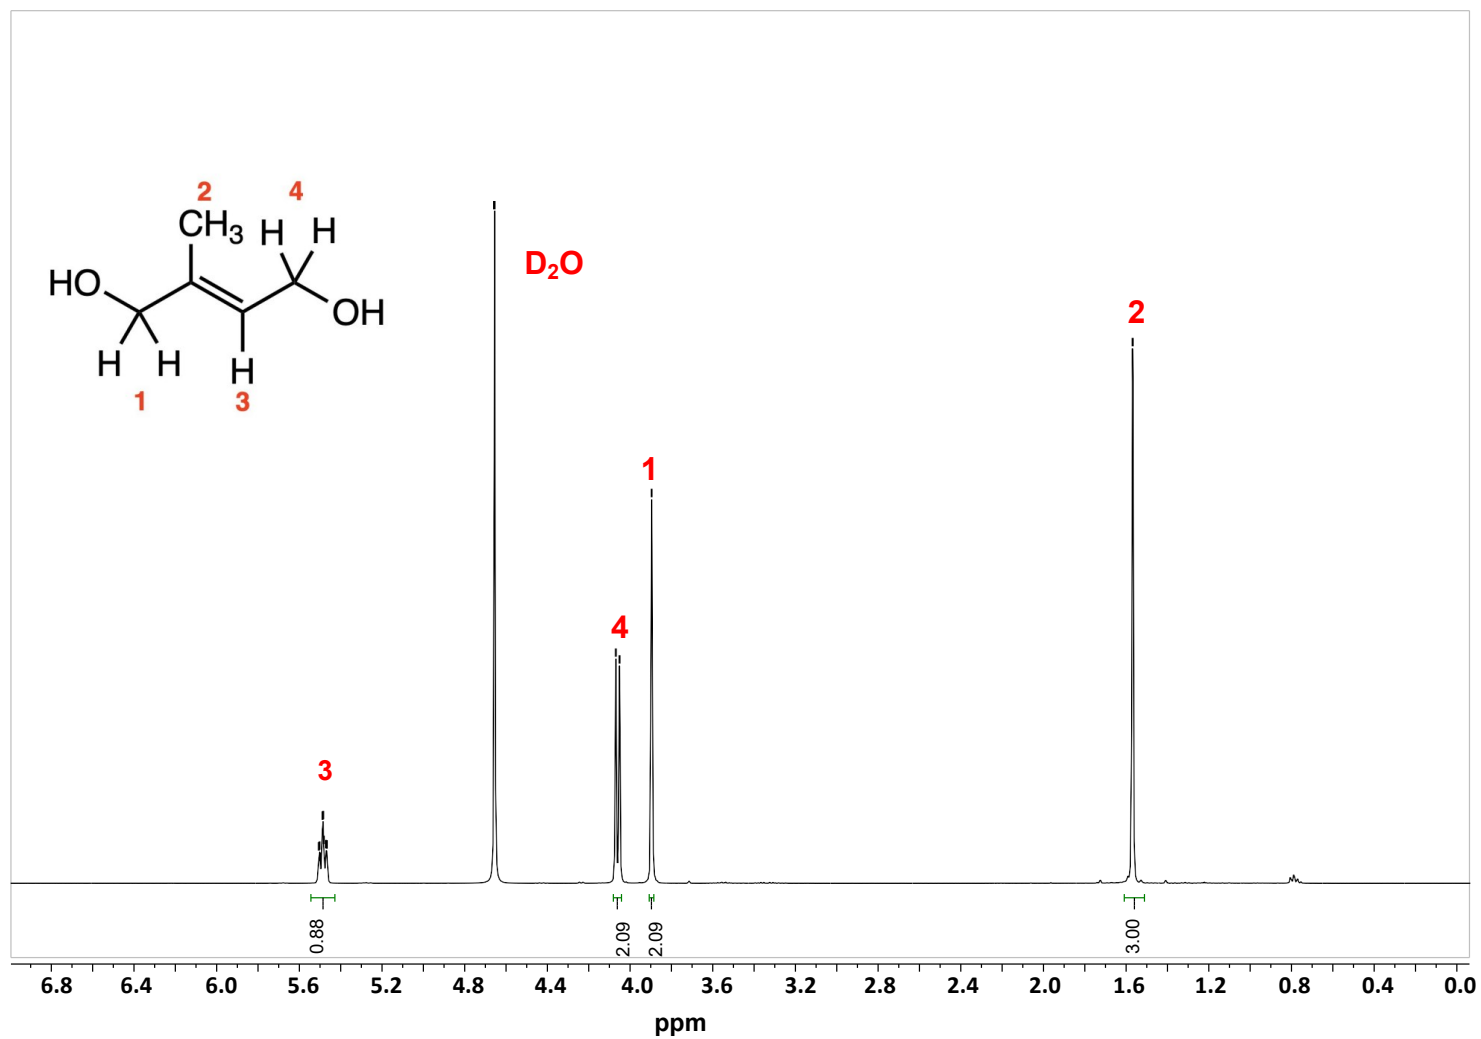

Figure S2.  $^1\text{H}$  NMR (400 MHz,  $\text{D}_2\text{O}$ ) *E*-2-methyl but-2-ene-1,4-diol.

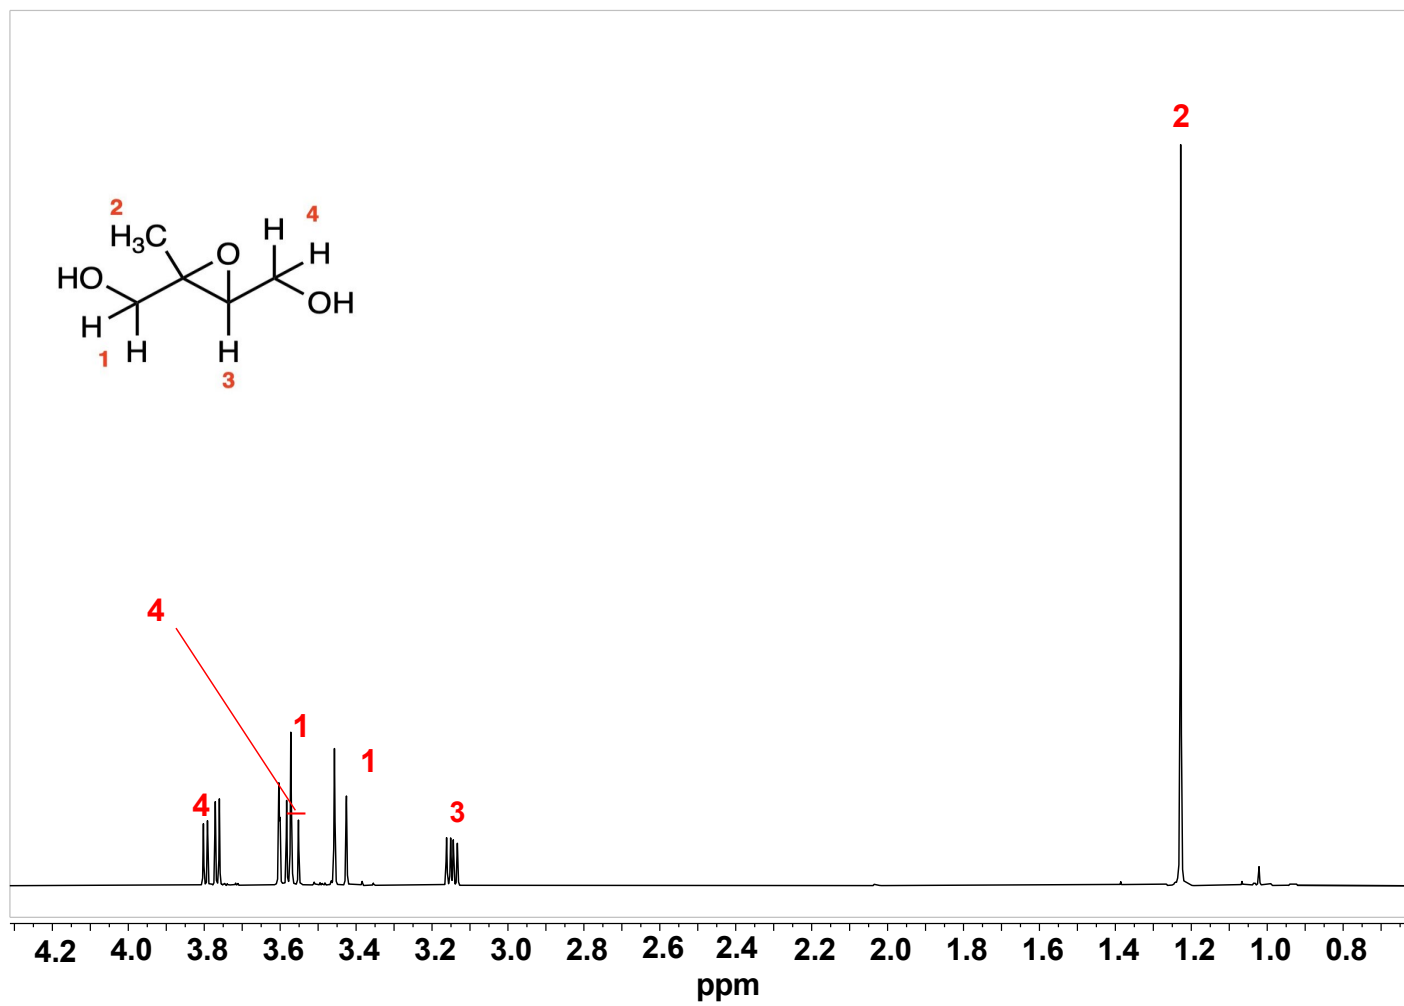

Figure S3. <sup>1</sup>H NMR (400 MHz, D<sub>2</sub>O) *trans*-(2-methyloxirane-2,3-diyl)dimethanol (*trans*-β-IEPOX).

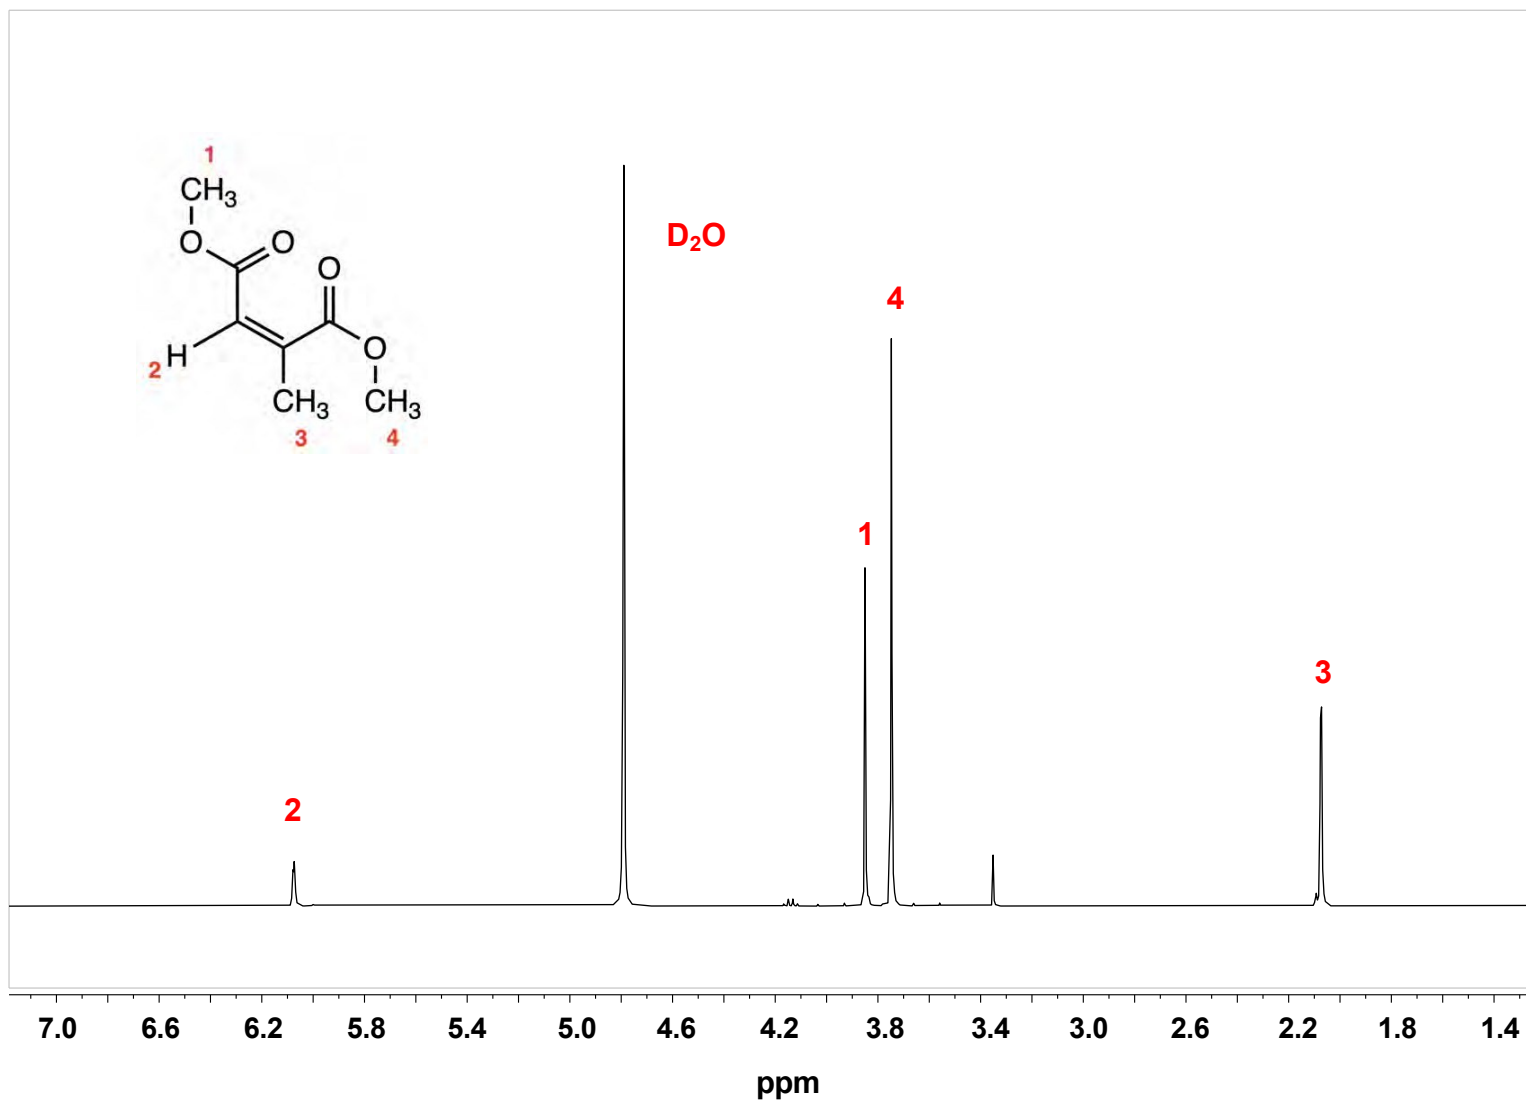

Figure S4.  $^1\text{H}$  NMR (400 MHz,  $\text{D}_2\text{O}$ ) citraconic acid dimethyl ester.

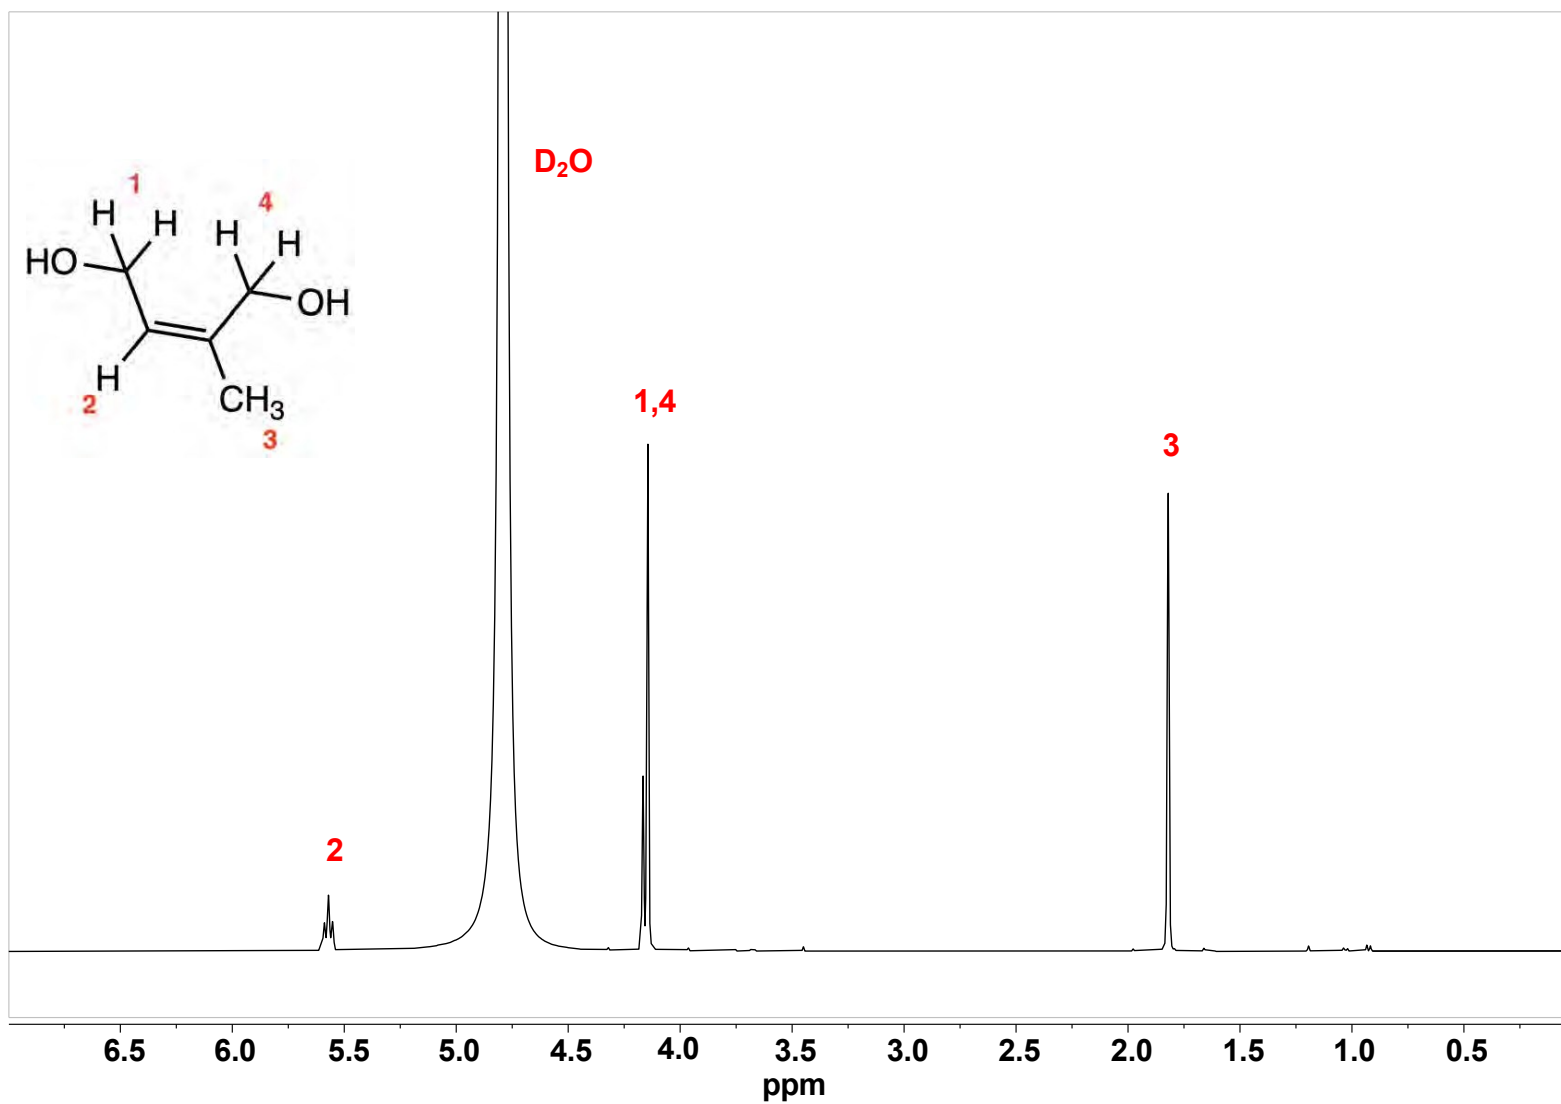

Figure S5.  $^1\text{H}$  NMR (400 MHz,  $\text{D}_2\text{O}$ ) Z-2-methyl but-2-ene-1,4-diol.

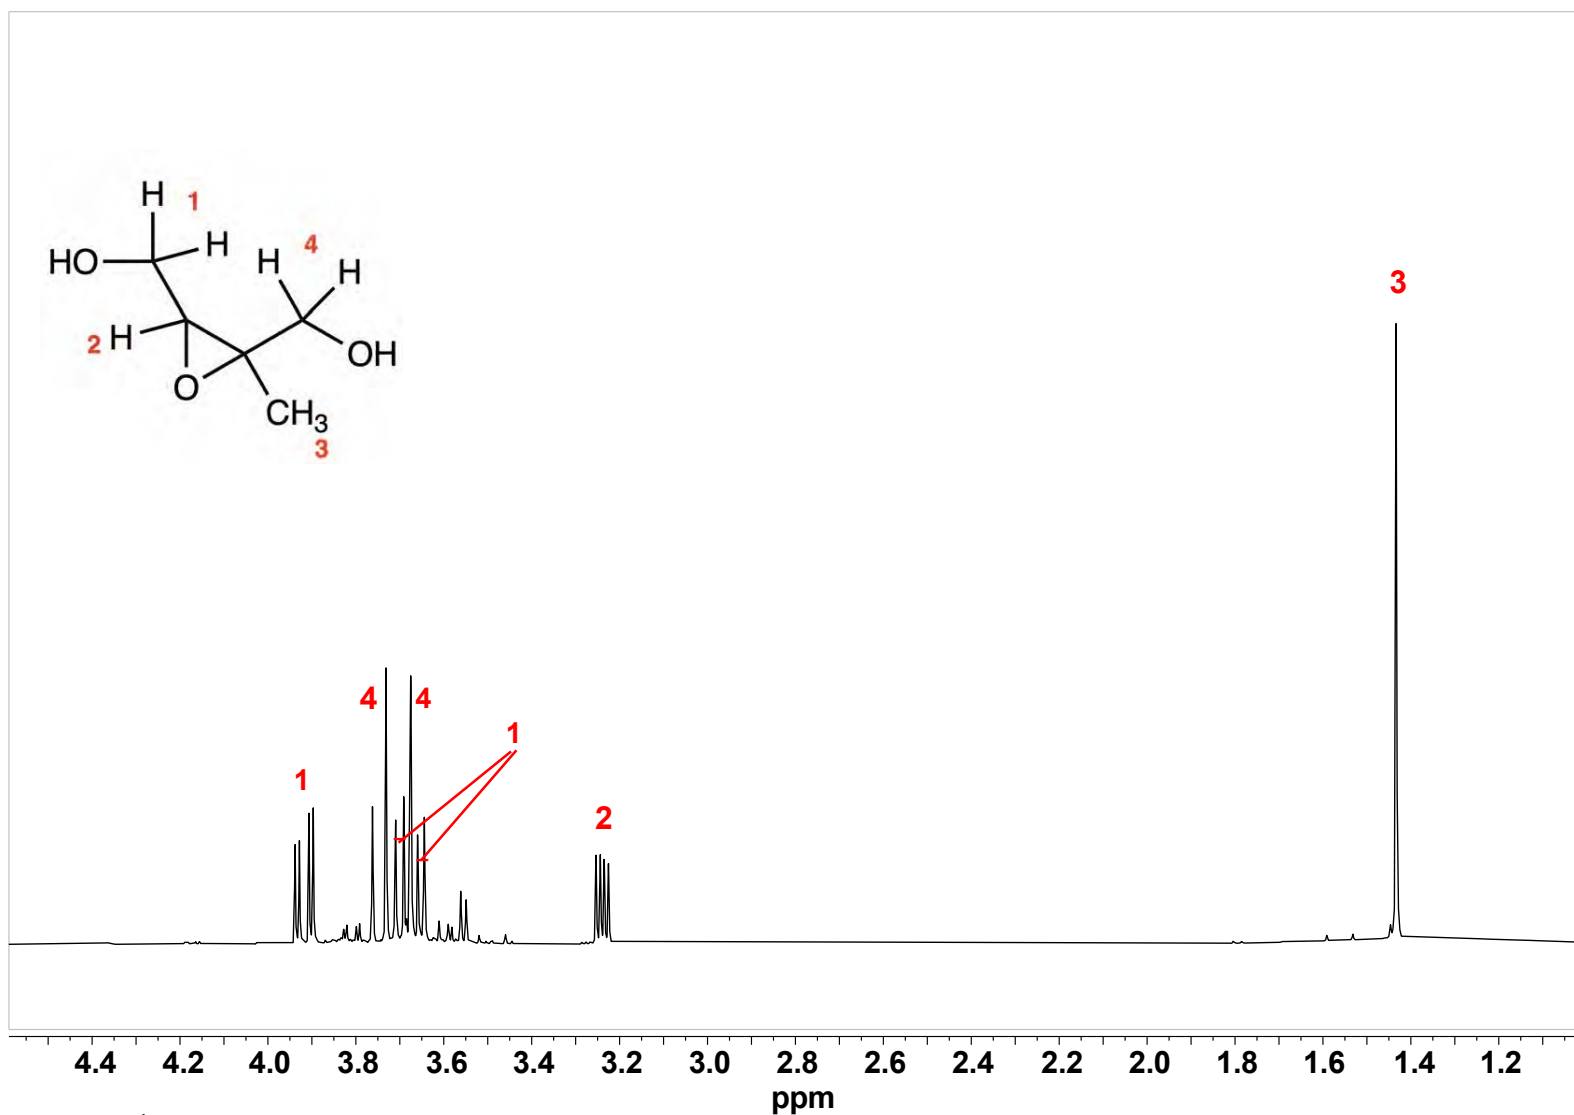

Figure S6. <sup>1</sup>H NMR (400 MHz, D<sub>2</sub>O) *cis*-(2-methyloxirane-2,3-diyl)dimethanol (*cis*-β-IEPOX).
